# Supplementary material
Source: MDPI journal article supplement (https://www.mdpi.com/2311-5637/9/2/148)
Supplement: s1 [file s1]

## Supplementary Materials

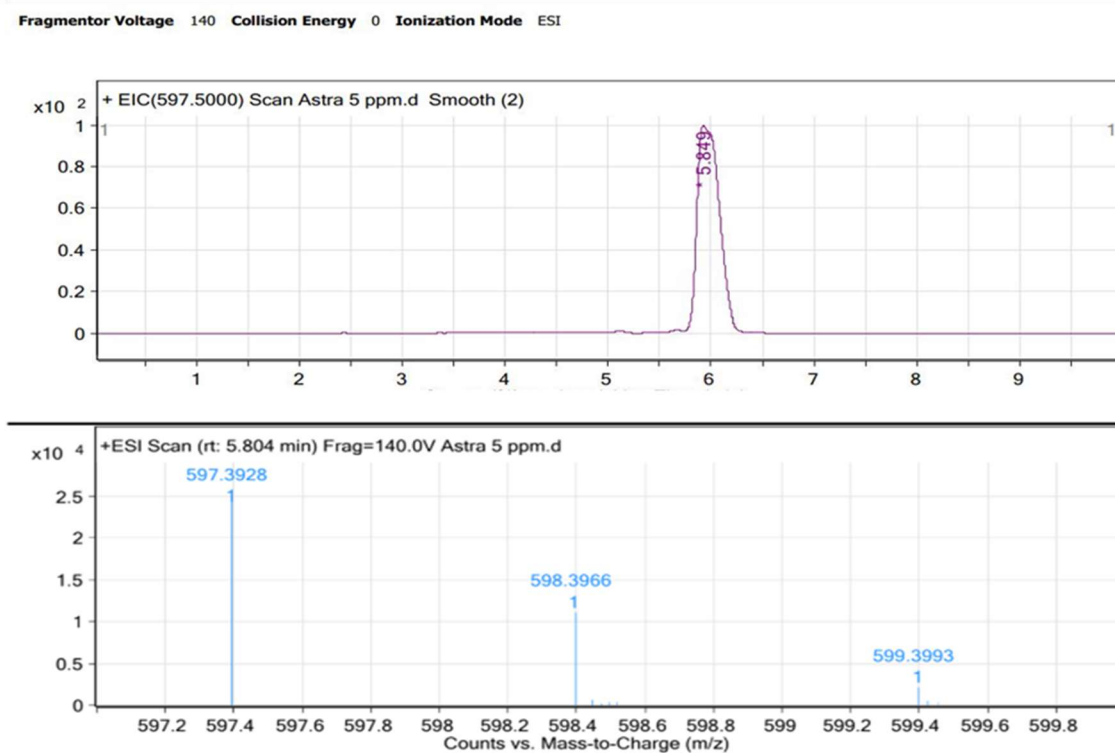

Figure S1. Liquid chromatography-mass spectrometry (LC-MS) chromatogram of astaxanthin standard.

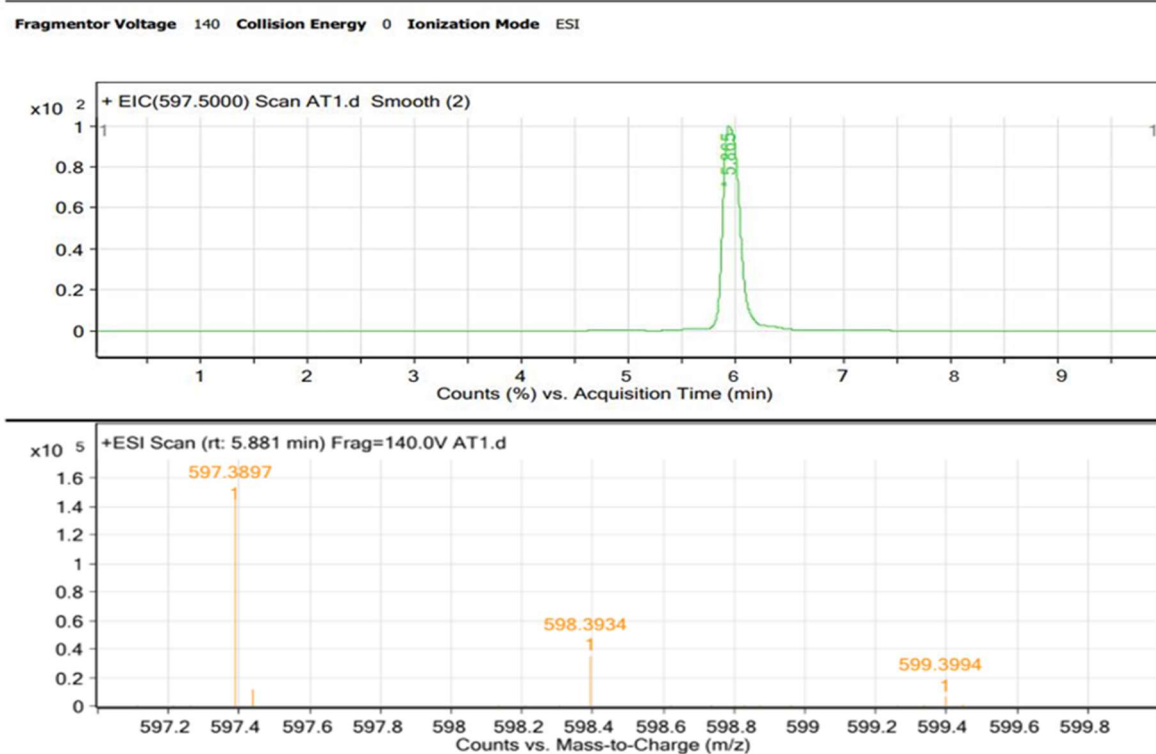

Figure S2. Liquid chromatography-mass spectrometry (LC-MS) chromatogram of extracted astaxanthin.
